# Supplementary material for: Arachidonic acid hyperpolarizes mesenchymal stromal cells from the human adipose tissue by stimulating TREK1 K+ channels
Source: PubMed Central journal article supplement (PMC6380217; doi:10.1080/19336950.2019.1565251), 2019-01-19
Supplement: kchl-13-01-1565251-s001.pdf [file kchl-13-01-1565251-s001.pdf]

## Supplementary Materials

### 1. RT-PCR analysis of expression of K2P channels in MSCs

*Table 1S. Sequences of gene-specific primers*

| Target gene    | 5'-sequence-3' (Forward/Reversed)                | Product size (bp)                                             |
|----------------|--------------------------------------------------|---------------------------------------------------------------|
| KCNK1 (TWIK1)  | GATTGGGATCACGTGTTACC<br>TTAAGCCTCTTCCTTGCACC     | 334                                                           |
| KCNK2 (TREK1)  | GTGGAAGATACGTTTATTAAGTGG<br>CTCTGAACCTCTCCACCTC  | 361                                                           |
| KCNK3 (TASK1)  | TCATCACCACCATCGGCTAC<br>GTAGTAGGCCTGGAAGAAG      | 305                                                           |
| KCNK4 (TRAAK)  | AAGCCATCTTCTTGAAGTGG<br>ACTACTCGCAGCCAGTTC       | 319                                                           |
| KCNK5 (TASK2)  | ACCGTCATTACCACCATTTGG<br>TAG TTG GCG CTG GGG TTC | 377                                                           |
| KCNK6 (TWIK2)  | TGTCTTGGCTGAGCATGCGT<br>GCCAGGAAGAGGTAGACTG      | 275                                                           |
| KCNK7          | CATCCTCACCACCACAGG<br>GTCCTAGAAGCAAGTAACCAAG     | 430, 530,<br>630, or 730<br>depending<br>on splice<br>variant |
| KCNK9          | ACGGTCATCACCACCATAGG<br>AAGCTCCACTCCTCACAC       | 293                                                           |
| KCNK10 (TREK2) | AACTGTCATTACGACCATAGGG<br>GCCTTGATTTACCCACCTC    | 528                                                           |
| KCNK12         | GGTGTCAACCATAGGTTTTCG<br>ATGAGCAGCACGTGGTAC      | 279                                                           |
| KCNK13         | TCATCGTGCTCTACCTGC<br>GTTGTCATCCCAAACCCTATG      | 274                                                           |
| KCNK15 (TASK5) | CGTCATCACTACCATCGAGTAC<br>CAGGTTCTCCGTGGACAC     | 211                                                           |
| KCNK16         | ACAGTCGTCACTACCATAGG<br>CTCCACATGGCTGAAGAC       | 276                                                           |
| KCNK17         | ACTCGCTGATCCGGGATG<br>CCCAGTGGTTTACTCCCTG        | 264                                                           |
| KCNK18         | TTCAGCACCGTGGGCTATG<br>CGTGAAGGACATGTGCCAAG      | 320                                                           |
| CD73           | AAGACATGACTCTGGTGACC<br>CTGTCACAAAGCCAGGTCC      | 266                                                           |
| CD90           | GTCACAGTGCTCAGAGAC<br>TACAAAAAGACAGCCAGAGG       | 344                                                           |
| CD105          | AGCAGAGCTTTGTGCAGGTC<br>GCTGATGATGTTCAAGCGCATG   | 317                                                           |

## 2. Effects of arachidonic acid on cytosolic $Ca^{2+}$ in MSCs.

In a number of experiments, the responsiveness of MSCs to AA and ATP, an effective  $Ca^{2+}$  mobilizer, was assayed with  $Ca^{2+}$  imaging. As illustrated in Fig.1S, 10  $\mu$ M AA affected cytosolic  $Ca^{2+}$  inessentially in all cells assayed (n=76), while purinergic MSCs (9 cells) responded to 3  $\mu$ M ATP with marked  $Ca^{2+}$  transients sufficient to activate  $Ca^{2+}$ -gated  $K^+$  channels (Tarasov et al. Pflugers Arch. 2017; 469: 349-362).

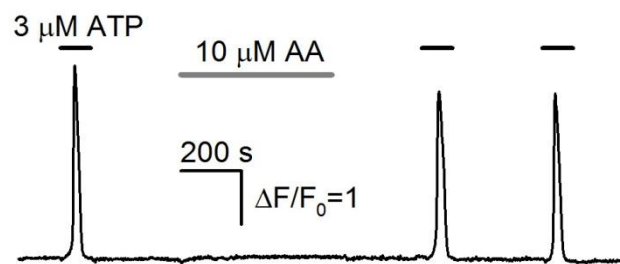

**Figure 1S.** Representative monitoring of intracellular  $Ca^{2+}$  in MSC stimulated by 3  $\mu$ M ATP and 10  $\mu$ M AA.

**Method.** For  $Ca^{2+}$  imaging, cells were plated onto a photometric chamber of nearly 150  $\mu$ l volume. This chamber was a disposable coverslip (Menzel-Glaser) with an attached ellipsoidal resin wall. The chamber bottom was coated with Cell-Tak (BD Biosciences), enabling strong cell adhesion. Attached cells were then loaded with the  $Ca^{2+}$  indicator Fluo-4 for 20 min at room temperature (23–25°C) by adding Fluo-4AM (4  $\mu$ M) or Fluo-4AM (4  $\mu$ M) + NP-EGTA-AM (4  $\mu$ M) and Pluronic (0.02%) (all from Molecular Probes) to a bath solution. Loaded cells were rinsed with the bath solution three times and kept at 4°C for 1 hour prior to recordings. Generally, the incubation of MSCs at low temperature stabilized intracellular  $Ca^{2+}$  and decreased a fraction of spontaneously oscillating cells.

Cells loaded with Fluo-4 were imaged using a fluorescent microscope Axiovert 135 equipped with an objective Plan-Neofluar 20 $\times$ /0.75 (Zeiss) and ECCD camera LucaR (Andor Technology). Fluo-4 fluorescence was excited at 480 $\pm$ 5 nm using LED controlled by a computer. Fluo-4 emission was collected at 535 $\pm$ 20 nm. Serial fluorescent images were captured every second and analyzed using the Imaging Workbench 6 software (INDEC). Deviations of cytosolic  $Ca^{2+}$  from the resting level were quantified by a relative change in the intensity of Fluo-4 fluorescence ( $\Delta F/F_0$ ) recorded from an individual cell.
